# Supplementary material for: Treatment of Chronic Venous Ulcers With Heterologous Fibrin Sealant: A Phase I/II Clinical Trial
Source: PubMed Central journal article supplement (PMC7940668; doi:10.3389/fimmu.2021.627541), 2021-02-23
Supplement: DataSheet_2.pdf [file DataSheet_2.pdf]

## Supplementary Material 2 – Evolution of the healing process

Tabela 1: Data related to the healing process of 25 participants (59 ulcers) who were followed up until the end of the study.

| Participant | Number of ulcer per participant (n=59) | Initial ulcer area | Final ulcer area |
|-------------|----------------------------------------|--------------------|------------------|
| 1           | 1*                                     | 10.89              | 0.0              |
|             | 2*                                     | 6.38               | 0.0              |
| 2           | 1*                                     | 1.94               | 0.0              |
|             | 2†                                     | 13.10              | 3.23             |
| 3           | 1#                                     | 2.48               | 13.02            |
|             | 2#                                     | 2.40               | 6.8              |
|             | 3#                                     | 4.66               | 10.75            |
| 4           | 1#                                     | 21.65              | 39.45            |
|             | 2#                                     | 31.25              | 43.53            |
| 5           | 1*                                     | 4.08               | 0.0              |
|             | 2*                                     | 0.26               | 0.0              |
|             | 3*                                     | 1.60               | 0.0              |
|             | 4†                                     | 3.67               | 1.31             |
| 6           | 1†                                     | 2.23               | 1.24             |
|             | 2†                                     | 5.37               | 0.26             |
| 7           | 1*                                     | 6.17               | 0.0              |
|             | 2†                                     | 4.87               | 1.82             |
| 8           | 1*                                     | 0.41               | 0.0              |

|    |    |       |       |
|----|----|-------|-------|
|    | 2* | 3.58  | 0.0   |
| 9  | 1* | 1.90  | 0.0   |
|    | 2* | 1.10  | 0.0   |
|    | 3* | 1.30  | 0.0   |
|    | 4† | 31.10 | 5.3   |
|    | 5* | 2.70  | 0.0   |
|    | 6* | 0.40  | 0.0   |
| 10 | 1# | 2.86  | 13.05 |
|    | 2# | 12.68 | 16.84 |
| 11 | 1# | 36.52 | 68.99 |
|    | 2# | 2.48  | 5.67  |
|    | 3# | 5.37  | 6.88  |
| 12 | 1# | 41.14 | 91.48 |
|    | 2* | 5.84  | 0.0   |
|    | 3* | 11.47 | 0.0   |
| 13 | 1* | 11.19 | 0.0   |
| 14 | 1† | 36.43 | 5.55  |
| 15 | 1† | 60.00 | 50.26 |
| 16 | 1† | 14.87 | 4.70  |
| 17 | 1† | 17.39 | 8.75  |
| 18 | 1† | 1.67  | 0.62  |
|    | 2* | 1.49  | 0.0   |
|    | 3* | 0.85  | 0.0   |
|    | 4* | 0.35  | 0.0   |
|    | 5† | 17.63 | 2.28  |

|    |    |       |       |
|----|----|-------|-------|
| 19 | 1* | 2.94  | 0.0   |
|    | 2* | 0.23  | 0.0   |
|    | 3* | 2.66  | 0.0   |
|    | 4* | 1.50  | 0.0   |
|    | 5* | 12.34 | 0.0   |
| 20 | 1* | 2.93  | 0.0   |
| 21 | 1† | 8.09  | 4.49  |
|    | 2† | 3.60  | 3.29  |
|    | 3* | 1.85  | 0.0   |
|    | 4# | 15.23 | 17.22 |
| 22 | 1† | 6.36  | 5.12  |
| 23 | 1† | 0.29  | 0.81  |
|    | 2† | 4.11  | 1.06  |
| 24 | 1† | 9.25  | 0.77  |
|    | 2† | 31.90 | 10.97 |
| 25 | 1* | 51.83 | 0.0   |

\* Ulcers healded

† Reduction of the ulcerated area

# Increased of the ulcerated area

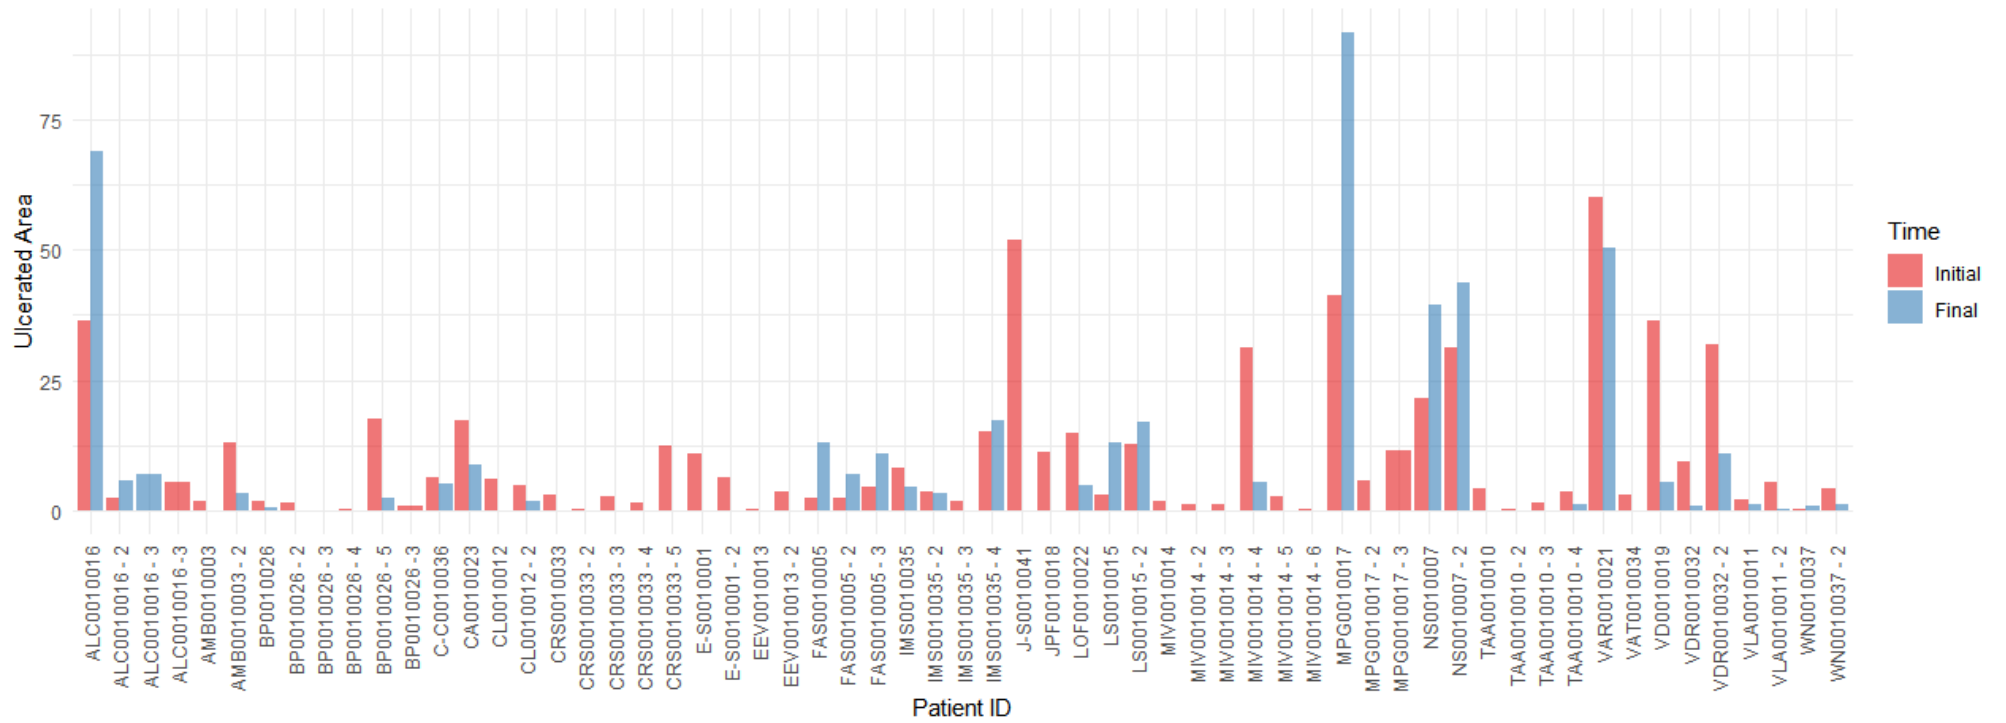

**Figure 1:** Comparison between initial and final ulcerated area per ulcer of 25 patients (59 ulcers).
